# Supplementary material
Source: PubMed Central journal article supplement (PMC6703909)
Supplement: NIHMS1530144-supplement-Supplemental_Material.pdf [file NIHMS1530144-supplement-Supplemental_Material.pdf]

## SUPPLEMENTAL MATERIAL

### Targeted deletion of hepatocyte Abca1 increases plasma HDL reverse cholesterol transport via the LDL receptor

Alexander C. Bashore, PhD<sup>1</sup>, Mingxia Liu, PhD<sup>1</sup>, Chia-Chi C. Key, PhD<sup>1</sup>, Elena Boudyguina, PharmD<sup>1</sup>, Xianfeng Wang, PhD<sup>1</sup>, Caitlin M. Carroll, BA<sup>3</sup>, Janet K. Sawyer, MS<sup>1</sup>, Adam E. Mullick, PhD<sup>2</sup>, Richard G. Lee, PhD<sup>2</sup>, Shannon L. Macauley, PhD<sup>3</sup>, John S. Parks, PhD<sup>1</sup>

<sup>1</sup>Department of Internal Medicine, Section on Molecular Medicine, Wake Forest School of Medicine, Winston-Salem, NC 27157

<sup>2</sup>Cardiovascular Group, Antisense Drug Discovery, Ionis Pharmaceuticals, Inc., Carlsbad, CA 92010, USA.

<sup>3</sup> Department of Internal Medicine, Section on Gerontology and Geriatric Medicine, Wake Forest School of Medicine, Winston-Salem, NC 27157

Short title: Liver Abca1 and HDL reverse cholesterol transport

#To whom correspondence should be addressed:

Dr. John S. Parks, Department of Internal Medicine/Section of Molecular Medicine, Wake Forest School of Medicine, Medical Center Blvd., Winston-Salem, NC 27157, USA. E-mail: [jparks@wakehealth.edu](mailto:jparks@wakehealth.edu) Tel: +1 336 716 2145; Fax: +1 336 716 6279

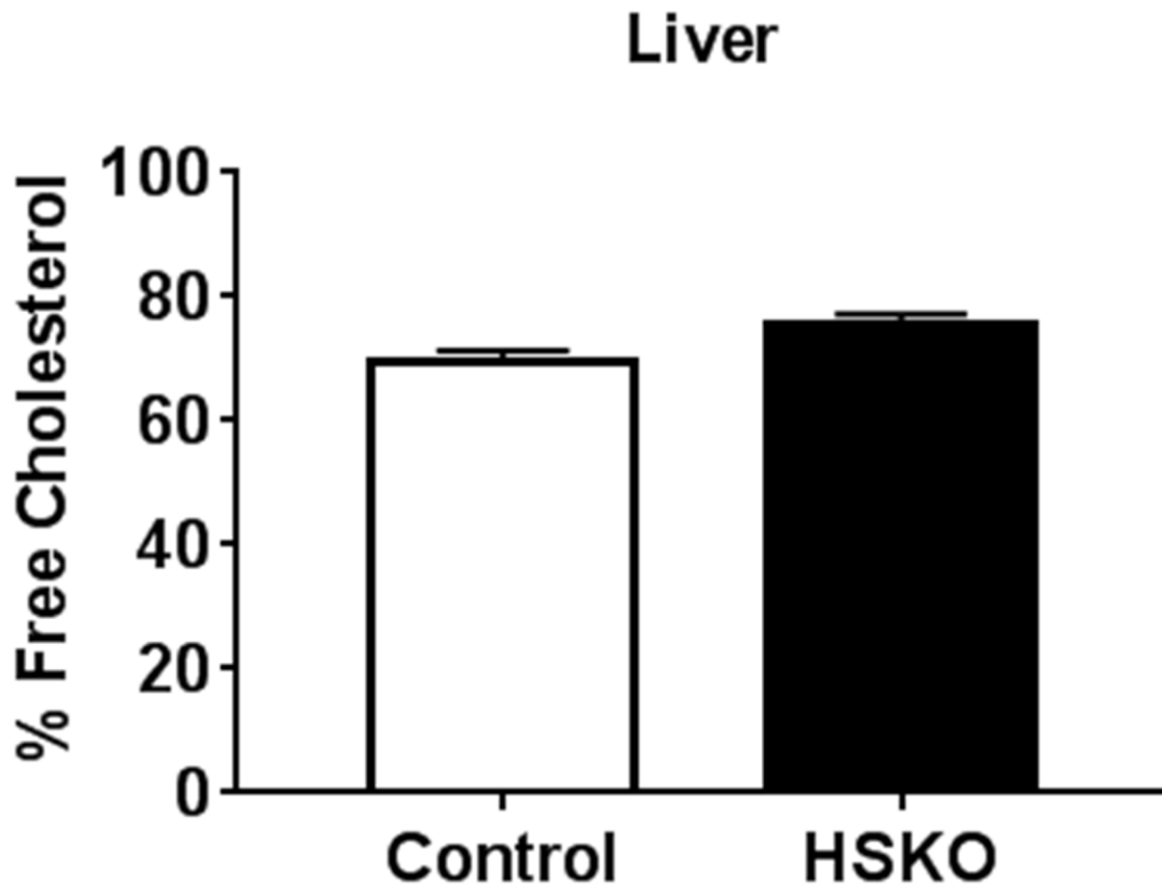

**Supplemental Figure I.** Hydrolysis of  $^3\text{H}$ -CO human HDL tracer to  $^3\text{H}$ -FC in liver. Percentage  $^3\text{H}$ -FC in liver 24 hours following  $^3\text{H}$ -CO human HDL injection into control or HSKO mice was determined after lipid extraction of liver, thin-layer chromatographic separation of FC and CE, and quantification of radiolabel by liquid scintillation counting. Approximately 70% of the plasma HDL-derived radioactivity was FC in both genotypes of mice, indicating significant hepatic hydrolysis of  $^3\text{H}$ -CO to  $^3\text{H}$ -FC. Data are mean  $\pm$  SEM; n=5/genotype.

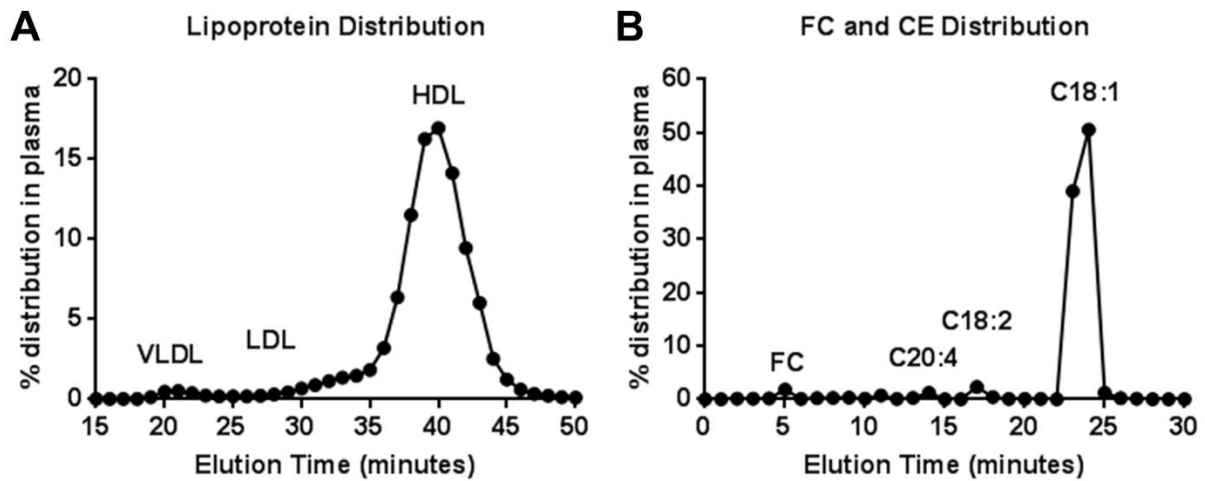

**Supplemental Figure II.**  $^3\text{H-CO}$  ( $^3\text{H-C18:1}$ ) HDL stability in plasma.  $^3\text{H-CO}$  radiolabeled human HDL was incubated with plasma at  $37^\circ\text{C}$  for 2 min up to 24 hours. Plasma was then fractionated by FPLC to determine  $^3\text{H}$  lipoprotein distribution (**A**). The plasma samples were then lipid extracted and  $^3\text{H-FC}$  and  $^3\text{H CE}$  fatty acyl distribution was analyzed by reverse phase HPLC (**B**). Only data from the 24-hour incubation are shown. Nearly all (95%) of the  $^3\text{H-CO}$  HDL tracer eluted in the HDL region of the FPLC column. After a 24-hour incubation of the  $^3\text{H-CO}$  HDL tracer with plasma at  $37^\circ\text{C}$ , 94% of the radiolabel eluted in HDL region, suggesting minimal transfer of radiolabel to other plasma lipoproteins (A). In the 2-min incubation, 96.5% of the HDL radiolabel eluted in the CO peak compared with 89.4% in the 24-hour time point, indicating minimal hydrolysis of the  $^3\text{H-CO}$  to  $^3\text{H-FC}$  over the 24-hour plasma incubation.

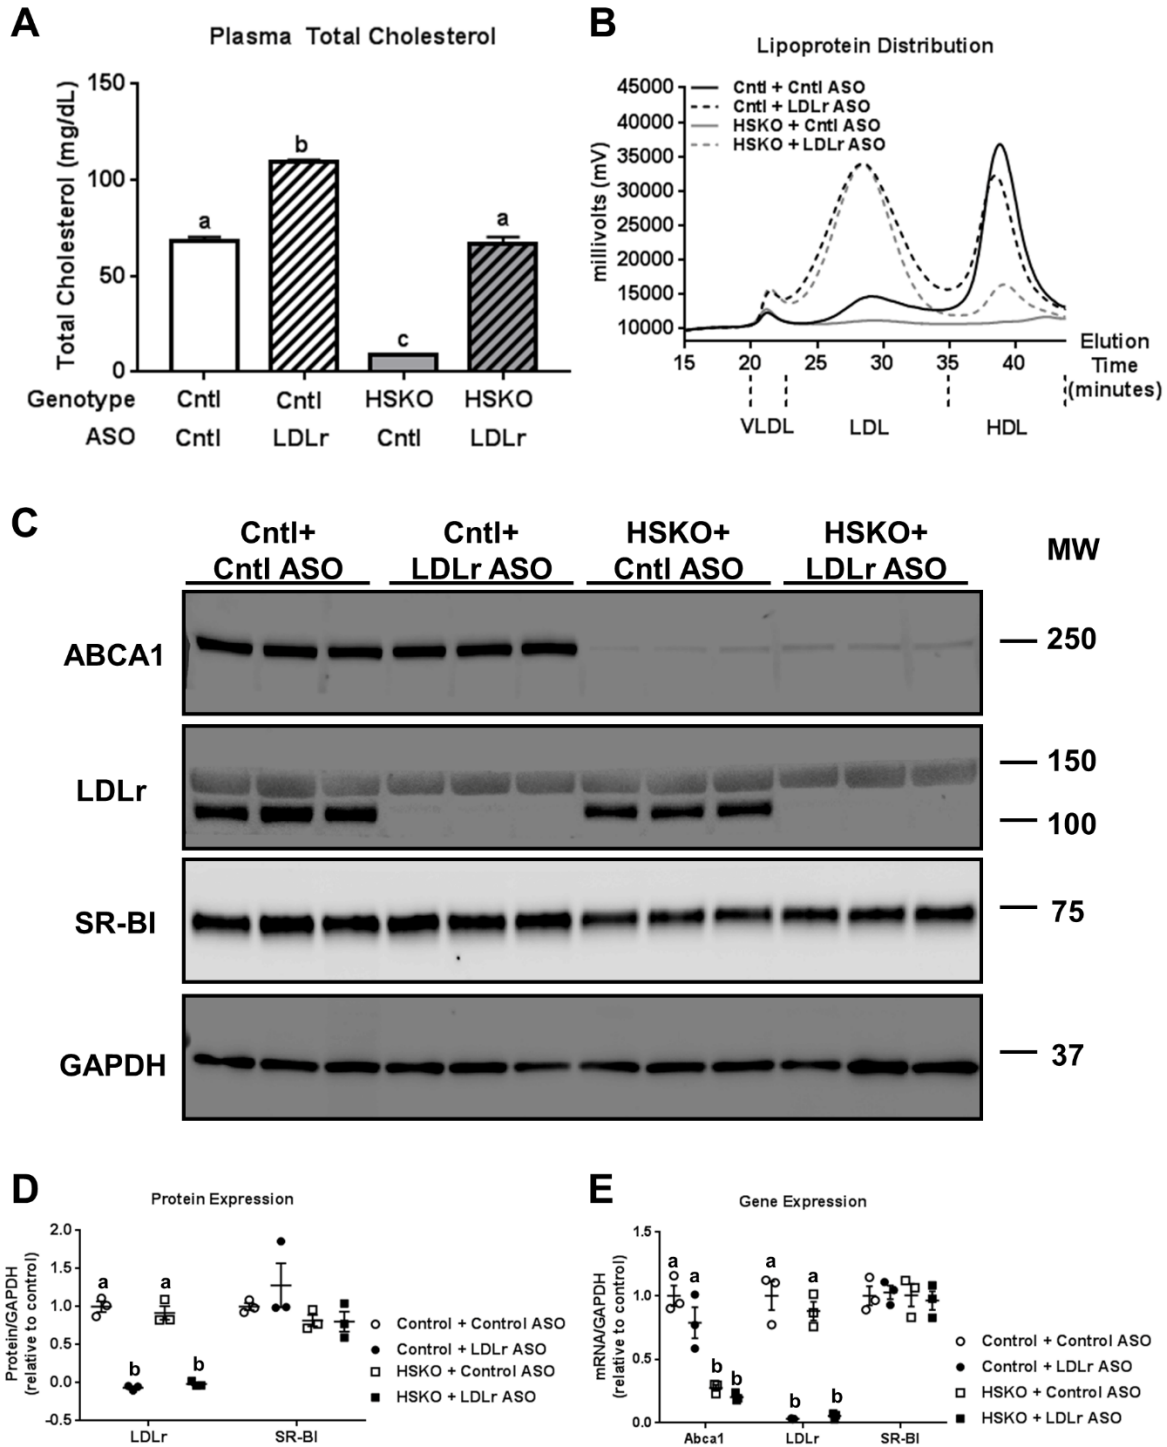

**Supplemental Figure III.** LDLr ASO treatment increases plasma LDL-C and HDL-C in HSKO mice. Efficiency of LDLr silencing was monitored by quantifying total plasma cholesterol (**A**) and

plasma lipoprotein cholesterol distribution by FPLC (mV signal from online cholesterol analyzer) **(B)** following 4 weeks of ASO treatment. Whole liver lysates were immunoblotted for Abca1, LDLr, and SR-BI **(C)** and blots were quantified **(D)** by calculating fold change in protein/GAPDH ratio relative to control mice treated with control ASO. Real-time PCR was performed to analyze gene expression for Abca1, LDLr, and SR-BI and the mRNA/GAPDH ratio relative to control mice treated with control ASO was plotted **(E)**. Data are mean  $\pm$  SEM; n=3 for each group. Groups with different letters are statistically different. Protein and gene expression data are from recipient mice used in mouse HDL tracer studies (Supplemental Figures IV and V).

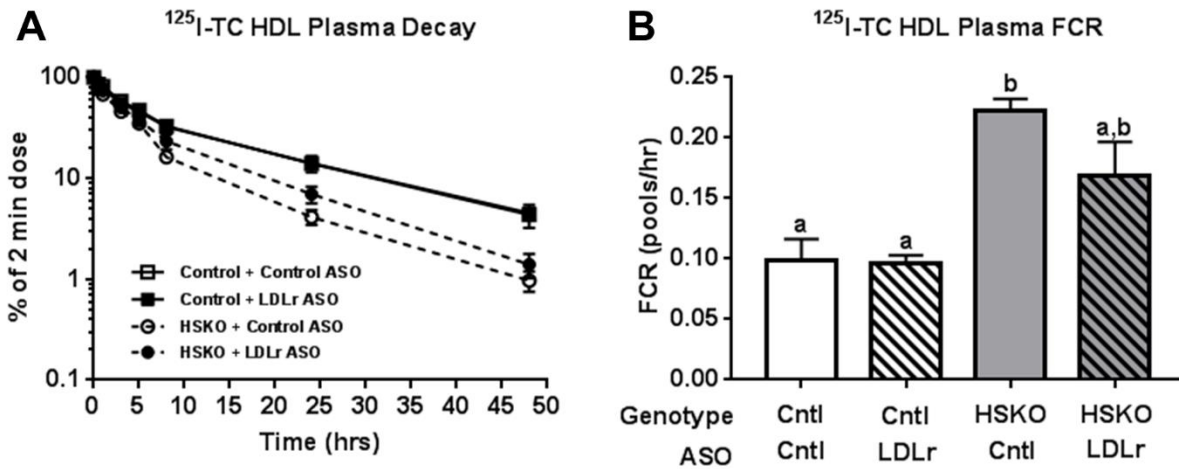

**Supplemental Figure IV.** Effect of LDLr ASO treatment on *in vivo* catabolism of <sup>125</sup>I-TC labeled mouse HDL. <sup>125</sup>I-TC labeled HDL was injected intravenously in control and HSKO treated with either a control or LDLr targeting ASO. Periodic blood samples were taken over 48 hours to analyze plasma decay (**A**) and FCR (**B**). Data are mean  $\pm$  SEM. Groups with different superscripts are statistically different ( $p < 0.05$ ),  $n = 3$  for each group. Control turnover curves in panel A are identical and SEM in nearly all points falls within the symbol.

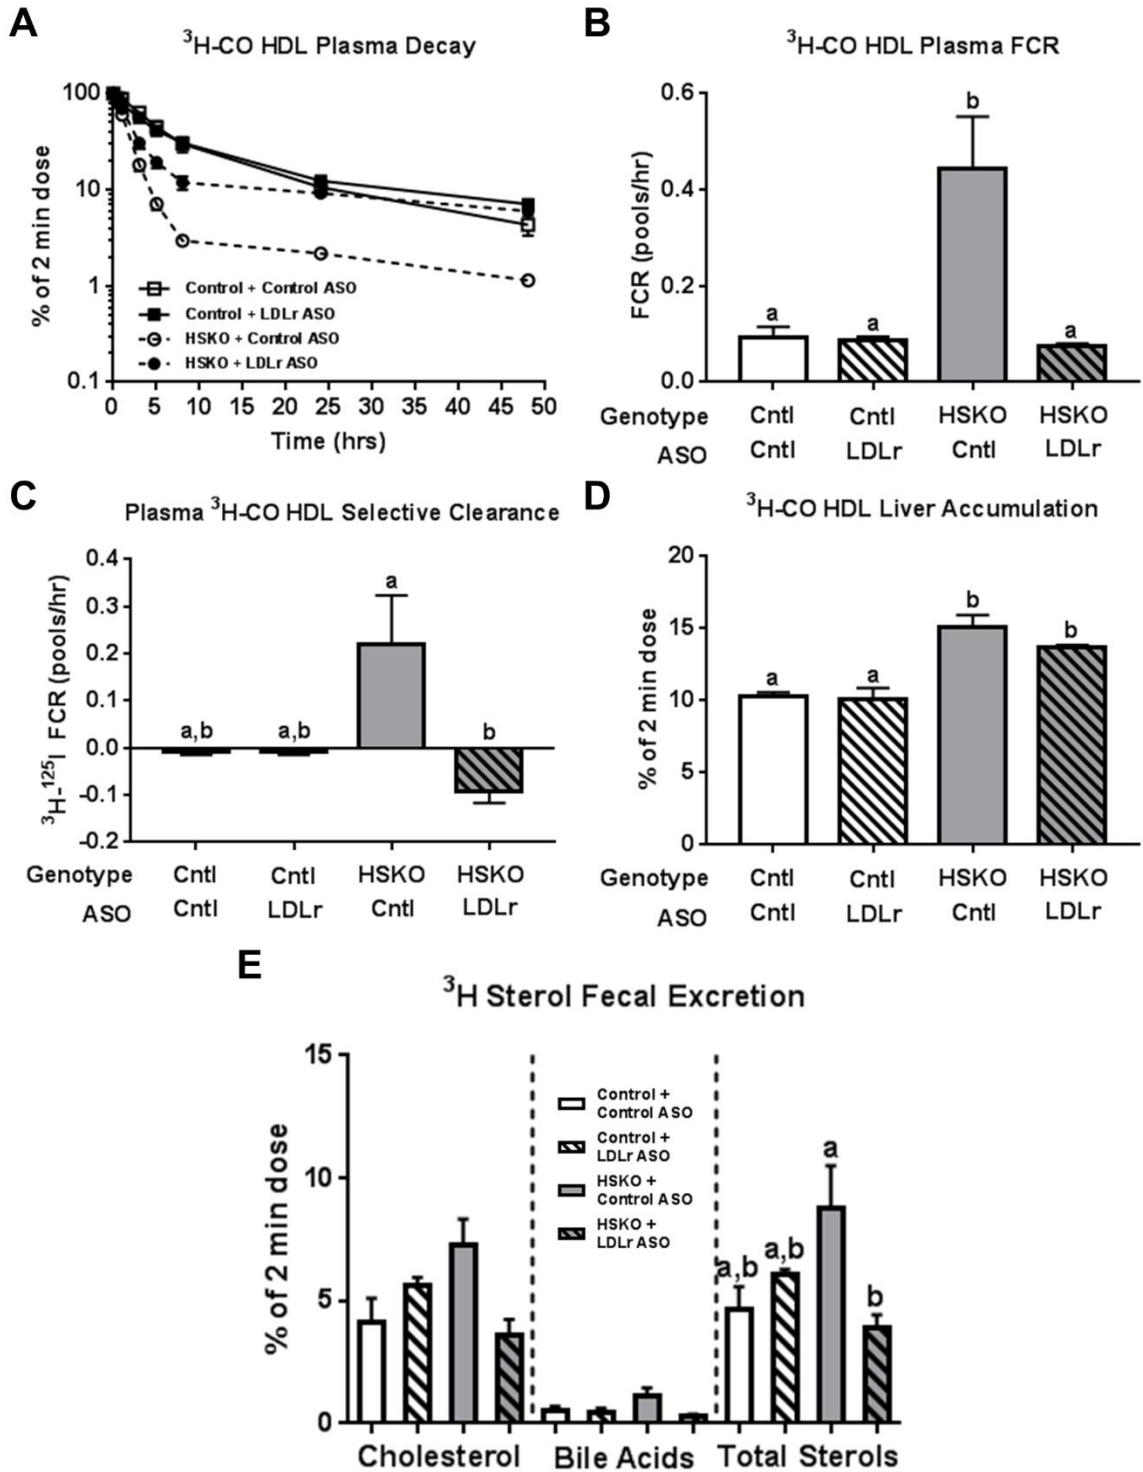

**Supplemental Figure V.** Effect of LDLr ASO treatment on *in vivo* catabolism of  $^3\text{H-CO}$  radiolabeled mouse HDL.  $^3\text{H-CO}$  radiolabeled HDL was injected intravenously in control and HSKO mice treated with either a control or LDLr targeting ASO for 4 weeks. Periodic blood

samples were taken over 48 hours to analyze plasma decay (**A**), plasma FCR (**B**), and plasma HDL <sup>3</sup>H-CO selective clearance, using data from Supplemental Figure IVB for <sup>125</sup>I-TC FCR (**C**). At the termination of the study, tissues were harvested to quantify liver accumulation (**D**) and fecal excretion (**E**) of the tracer. Data are mean ± SEM. Groups with different superscripts are statistically different (p<0.05), n=3 for each group.
